# Supplementary material
Source: ML conference proceedings conference paper supplement (https://proceedings.mlr.press/v32/niepert14.html)
Supplement: Supplementary file 1 [file niepert14-supp.zip]

Archive with 1 entries (1 files):
- evm.10-12.pdf
